# Supplementary material
Source: PubMed Central journal article supplement (PMC3775504)
Supplement: NIHMS505035-supplement-Table_S1.pdf [file NIHMS505035-supplement-Table_S1.pdf]

| Species                   | n | Conjugation | Type       | head shape | mean length (SE) | Long sperm? | Dimorphism ? | Short morph mean length (SE) | Source                                           |
|---------------------------|---|-------------|------------|------------|------------------|-------------|--------------|------------------------------|--------------------------------------------------|
| Acilius fraternus         | 1 | Y           | paired     | broad      | 0.240            | N           | N            |                              | this study                                       |
| Acilius mediatius         | 5 | Y           | paired     | broad      | 0.177 (0.003)    | N           | N            |                              | this study                                       |
| Acilius semisulcatus      | 5 | Y           | paired     | broad      | 0.243 (0.005)    | N           | N            |                              | this study                                       |
|                           |   |             |            |            |                  |             |              |                              | Werner 1976, Jamieson et al 1999, Ballowitz 1895 |
| Acilius sulcatus          | 1 | Y           | paired     | broad      | 0.360            | N           | N            |                              | this study                                       |
| Acilius sylvanus          | 5 | Y           | paired     | broad      | 0.253 (0.004)    | N           | N            |                              | this study                                       |
| Agabetes acuductus        | 4 | Y           | aggregate? | broad      | 1.874 (0.064)    | Y           | Y            | 0.601 (0.007)                | this study                                       |
| Agabus ambiguus           | 5 | Y           | aggregate  | broad      | 1.086 (0.013)    | Y           | N            |                              | this study                                       |
| Agabus anthracinus        | 1 | Y           | aggregate  | elongate   | 0.397            | N           | N            |                              | this study                                       |
| Agabus bifarius           | 2 | Y           | aggregate  | elongate   | 0.669 (0.007)    | Y           | N            |                              | this study                                       |
| Agabus disintegratus      | 2 | Y           | aggregate  | broad      | 1.315*           | Y           | N            |                              | this study                                       |
| Agabus griseipennis       | 2 | Y           | aggregate  | elongate   |                  |             | N            |                              | this study                                       |
| Agabus strigulosus        | 4 | Y           | aggregate  | elongate   | 0.296*           | N           | N            |                              | this study                                       |
| Allodessus bistrigatus    | 2 | Y           | rouleaux   | broad      | 1.180*           | Y           | N            |                              | this study                                       |
| Amphizoa insolens         | 1 | N           |            | elongate   | 0.7838           | Y           | Y            | 0.386                        | this study                                       |
| Amphizoa lecontei         | 2 | N           |            | elongate   | 1.196 (0.022)    | Y           | Y            | 0.356 (0.004)                | this study                                       |
| Anodocheilus maculatus    | 6 | Y           | rouleaux   | broad      | 0.705            | Y           | N            |                              | this study                                       |
| Antiporus blakeii         | 4 | Y           | rouleaux   | broad      | 0.621*           | Y           | N            |                              | this study                                       |
| Batrachomatus daemeli     | 1 | Y           | aggregate  | elongate   | 0.358            | N           | N            |                              | this study                                       |
| Unknown Bidessini         | 1 | Y           | rouleaux   | broad      | 0.751            | Y           | N            |                              | this study                                       |
| Bidessonotus inconspicuus | 5 | Y           | rouleaux   | elongate   | 1.629            | Y           | N            |                              | this study                                       |
| Bidessonotus obtusatus    | 2 | Y           | rouleaux   | elongate   |                  |             | N            |                              | this study                                       |
| Celina hubbelli           | 4 | Y           | rouleaux   | broad      | 3.581*           | Y           | N            |                              | this study                                       |
| Celina sp.                | 1 | Y           | rouleaux   | broad      | 4.067*           | Y           | N            |                              | this study                                       |
| Chostonectes gigas        | 3 | Y           | rouleaux   | elongate   | 1.328 (0.016)    | Y           | N            |                              | this study                                       |
| Chostonectes nebulosus    | 1 | Y           | rouleaux   | elongate   | 0.128*           | N           | N            |                              | this study                                       |
| Clypeodytes sp.           | 1 | ?           |            | elongate   | 0.402*           | N           | N            |                              | this study                                       |
| Colymbetes exeratus       | 2 | Y           | aggregate  | elongate   | 0.374 (0.006)    | N           | N            |                              | this study                                       |
|                           |   |             |            |            |                  |             |              |                              | Dallai and Afzelius 1987, Mackie & Walker 1974   |
| Colymbetes fuscus         | 1 | Y           | aggregate  | elongate   | 0.530            | Y           | N            |                              | this study                                       |
| Colymbetes sculptilis     | 2 | Y           | aggregate  | elongate   | 0.298 (0.002)    | N           | N            |                              | this study                                       |

|                                     |   |   |           |          |                |   |   |                                                             |
|-------------------------------------|---|---|-----------|----------|----------------|---|---|-------------------------------------------------------------|
| <i>Colymbetes strigatus</i>         | 1 | Y | aggregate | elongate |                |   | N | Ballowitz 1895                                              |
| <i>Copelatus glyphicus</i>          | 5 | N |           | elongate | 0.722 (0.010)  | Y | N | this study                                                  |
| <i>Coptotomus longulus lenticus</i> | 5 | N |           | elongate | 1.538 (0.054)  | Y | Y | 0.575 (0.005)<br>this study                                 |
| <i>Cybister lateralimarginalis</i>  | 1 | ? |           |          |                |   | Y | Voinov 1902                                                 |
| <i>Cybister tripunctatus</i>        | 1 | ? |           |          | 0.920*         | Y | ? | this study                                                  |
| <i>Deronectes</i> sp.               | 3 | Y | rouleaux  | elongate |                |   | N | this study                                                  |
| <i>Derovatellus peruanus</i>        | 2 | Y | rouleaux  | broad    | 0.226*         | N | Y | 0.214*<br>this study                                        |
| <i>Desmopachria convexa</i>         | 6 | N |           | elongate | 1.517 (0.026)  | Y | N | this study                                                  |
| <i>Desmopachria portmanni</i>       | 3 | N |           | elongate | 0.967*         | Y | N | this study                                                  |
| <i>Dytiscus circumcinctus</i>       | 1 | Y | paired    | elongate |                |   | N | Ballowitz 1895                                              |
| <i>Dytiscus dimidiatus</i>          | 1 | Y | paired    | elongate |                |   | N | Ballowitz 1895                                              |
| <i>Dytiscus hybridus</i>            | 1 | Y | paired    | elongate | 0.9778         | Y | N | this study                                                  |
| <i>Dytiscus latissimus</i>          | 1 | Y | paired    | elongate |                |   | N | Ballowitz 1895                                              |
| <i>Dytiscus marginalis</i>          | 2 | Y | paired    | elongate | 0.940 - 0.950  | Y | N | Dallai & Afzelius 1987, Mackie and Walker 1974, Werner 1976 |
| <i>Dytiscus verticalis</i>          | 5 | Y | paired    | elongate | 0.945 (0.040)  | Y | N | this study                                                  |
| <i>Eretes sticticus</i>             | 2 | Y | paired    | broad    | 0.282 (0.001)  | N | N | this study                                                  |
| <i>Graphoderus cinereus</i>         | 1 | Y | paired    | broad    |                |   | N | Ballowitz 1895, Dallai & Afzelius 1987                      |
| <i>Graphoderus fascicollis</i>      | 5 | Y | paired    | broad    | 0.200 (0.002)  | N | N | this study                                                  |
| <i>Graphoderus liberus</i>          | 5 | Y | paired    | broad    | 0.200 (0.002)  | N | N | this study                                                  |
| <i>Graphoderus perplexus</i>        | 5 | Y | paired    | broad    | 0.244 (0.004)  | N | N | this study                                                  |
| <i>Graphoderus zonatus</i>          | 1 | Y | paired    | broad    |                |   | N | Ballowitz 1895                                              |
| <i>Graptodytes</i> sp.              | 1 | Y | rouleaux  | elongate |                |   | N | this study                                                  |
| <i>Heterhydrus</i> sp.              | 1 | Y | rouleaux? | broad    |                |   | Y | this study                                                  |
| <i>Heterosternuta pulcher</i>       | 5 | Y | rouleaux  | broad    | 1.284 (0.028)  | Y | N | this study                                                  |
| <i>Hydaticus aruspex</i>            | 1 | Y | paired    | broad    | 0.234          | N | N | this study                                                  |
| <i>Hydaticus bimarginatus</i>       | 4 | Y | paired    | broad    | 0.300 (0.005)  | N | N | this study                                                  |
| <i>Hydaticus continentalis</i>      | 1 | Y | paired    | broad    |                |   | N | Ballowitz 1895                                              |
| <i>Hydaticus dorsiger</i>           | 2 | Y | paired    | broad    | 0.060 (0.001)  | N | N | this study                                                  |
| <i>Hydaticus seminiger</i>          | 1 | Y | paired    | broad    |                |   | N | Dallai and Afzelius 1985                                    |
| <i>Hydaticus transversalis</i>      | 1 | Y | paired    | broad    | 0.290          | N | N | Werner 1976, Werner et al 1972                              |
| <i>Hydrocolus paugus</i>            | 2 | Y | rouleaux  | broad    | 1.5663 (0.008) | Y | N | this study                                                  |
| <i>Hydrocolus stagnalis</i>         | 5 | Y | rouleaux  | broad    | 1.768*         | Y | N | this study                                                  |
| <i>Hydrodessus</i> sp.              | 1 | ? |           | broad    | 0.342*         | N | N | this study                                                  |
| <i>Hydroglyphus flammulatus</i>     | 3 | Y | rouleaux  | broad    | 0.815*         | Y | N | this study                                                  |

|                            |   |   |            |          |               |   |   |                |                          |
|----------------------------|---|---|------------|----------|---------------|---|---|----------------|--------------------------|
| Hydroporus sp.             | 3 | Y | rouleaux   | broad    | 0.560 (0.015) | Y | N |                | this study               |
| Hydroporus sp.             | 5 | Y | rouleaux   | broad    | 0.448 (0.014) | N | N |                | this study               |
| Hydrovatus pustulatus      | 9 | Y | rouleaux   | broad    | 4.493*        | Y | N |                | this study               |
| Hygrobia hermanni          | 1 | Y | rouleaux   | broad    | 1.525*        | Y | N |                | this study               |
| Hygrotus dissimilis        | 1 | Y | aggregate  | elongate | 1.198         | Y | Y | 0.1492         | this study               |
| Hygrotus diversipes        | 1 | Y | aggregate  | elongate | 1.564         | Y | Y | 0.1686         | this study               |
| Hygrotus impressopunctatus | 5 | Y | aggregate  | elongate | 0.241 (0.011) | N | Y | 0.162 (0.008)  | this study               |
| Hygrotus infuscatus        | 1 | Y | aggregate  | elongate | 0.974         | Y | Y | 0.2274         | this study               |
| Hygrotus lutescens         | 1 | Y | aggregate  | elongate | 1.692         | Y | Y | 0.2028         | this study               |
| Hygrotus marklini          | 2 | Y | aggregate  | elongate | 1.328 (0.038) | Y | Y | 0.164 (0.002)  | this study               |
| Hygrotus masculinus        | 1 | Y | aggregate  | elongate | 1.098         | Y | Y | 0.2616         | this study               |
| Hygrotus picatus           | 8 | Y | aggregate  | elongate | 0.377 (0.009) | N | Y | 0.176 (0.008)  | this study               |
| Hygrotus sayi              | 5 | Y | rouleaux   | broad    | 0.531 (0.006) | Y | Y | 0.439 (0.029)  | this study               |
| Hygrotus semivittatus      | 1 | Y | aggregate  | elongate | 2.334         | Y | Y | 0.242 (0.002)  | this study               |
| Hygrotus tumidiventris     | 4 | Y | aggregate  | elongate | 1.427 (0.035) | Y | Y | 0.194 (0.006)  | this study               |
| Hyphydrus aubei            | 4 | Y | rouleaux   | broad    |               |   | N |                | this study               |
| Hyphydrus elegans          | 8 | Y | rouleaux   | broad    | 0.180         | N | N |                | this study               |
| Ilybiosoma cordatum        | 1 | y | aggregate  | broad    | 0.212*        | N | N |                | this study               |
| Ilybiosoma seriatum        | 7 | Y | aggregate  | broad    | 0.398 (0.005) | N | N |                | this study               |
| Ilybius gagates            | 1 | Y | aggregate  | broad    | 0.193         | N | Y | 0.1286         | this study               |
| Ilybius larsoni            | 2 | Y | aggregate  | broad    | 0.378 (0.009) | N | Y | 0.184 (0.0001) | this study               |
| Ilybius oblitus            | 2 | Y | aggregate  | broad    | 1.965         | Y | Y | 0.9595         | this study               |
| Ilybius vancouverensis     | 5 | Y | aggregate  | broad    | 0.155 (0.005) | N | N |                | this study               |
| Laccophilus fasciatus      | 5 | Y | rouleaux   | broad    | 0.833 (0.015) | Y | N |                | this study               |
| Laccophilus horni          | 2 | Y | rouleaux   | elongate | 1.263         | Y | N |                | this study               |
| Laccophilus maculosus      | 5 | Y | rouleaux   | broad    | 1.111 (0.020) | Y | N |                | this study               |
| Laccophilus sp.            | 3 | Y | rouleaux   | elongate |               |   | N |                | this study               |
| Limbodessus compactus      | 3 | Y | rouleaux   | broad    | 1.126*        | Y | N |                | this study               |
| Liodessus affinis          | 5 | Y | rouleaux   | broad    | 0.574 (0.014) | Y | N |                | this study               |
| Liodessus obscurellus      | 2 | Y | rouleaux   | broad    | 0.541 (0.013) | Y | N |                | this study               |
| Lioporeus pilatei          | 1 | Y | aggregate? | broad    | 0.203         | N | N |                | this study               |
| Lioporeus triangularis     | 1 | Y | aggregate? | broad    | 0.196         | N | N |                | this study               |
| Matus bicarinatus          | 5 | Y | rouleaux   | elongate | 1.196 (0.033) | Y | N |                | this study               |
| Megaporus hamatus          | 1 | Y | rouleaux   | broad    | 1.159*        | Y | N |                | this study               |
| Megaporus sp               | 2 | ? |            | broad    | 0.853*        | Y | N |                | this study               |
| Melanodytes pustulatus     | 1 | Y | paired     | broad    |               |   | N |                | Dallai and Afzelius 1987 |
| Nebrioporus rotundatus     | 5 | Y | rouleaux   | broad    | 0.681 (0.017) | Y | N |                | this study               |
| Necterosoma sp.            | 5 | Y | rouleaux   | elongate | 0.822*        | Y | N |                | this study               |
| Necterosoma sp.            | 2 | Y | rouleaux   | elongate | 0.704*        | Y | N |                | this study               |
| Necterosoma susana         | 1 | Y | rouleaux   | elongate |               |   | N |                | this study               |
| Neoclypeodytes fryii       | 1 | Y | rouleaux   | broad    | 0.633         | Y | N |                | this study               |

|                             |   |   |           |          |               |   |   |               |             |
|-----------------------------|---|---|-----------|----------|---------------|---|---|---------------|-------------|
| Neoporus arizonicus         | 1 | Y | rouleaux  | broad    |               |   | N |               | this study  |
| Neoporus mellitus           | 1 | Y | rouleaux  | broad    | 1.665*        | Y | N |               | this study  |
| Neoporus sp.                | 5 | Y | rouleaux  | broad    | 1.352 (0.038) | Y | N |               | this study  |
| Neoporus sp.                | 1 | Y | rouleaux  | broad    | 1.561*        | Y | N |               | this study  |
| Neoporus superioris         | 2 | Y | rouleaux  | broad    | 1.164 (0.059) | Y | N |               | this study  |
| Neoporus undulatus          | 6 | Y | rouleaux  | broad    | 1.342 (0.020) | Y | N |               | this study  |
| Neoporus vittatus           | 1 | Y | rouleaux  | broad    | 1.556*        | Y | N |               | this study  |
| Neoprous dimidiatus         | 4 | Y | rouleaux  | broad    | 2.099 (0.023) | Y | N |               | this study  |
| Oreodytes congruus          | 3 | Y | rouleaux  | broad    | 0.215 (0.005) | N | N |               | this study  |
| Oreodytes obesus            | 5 | Y | rouleaux  | broad    | 0.252 (0.005) | N | N |               | this study  |
| Oreodytes scitulus          | 2 | Y | rouleaux  | broad    | 0.406         | N | N |               | this study  |
| Oreodytes snowqualamie      | 3 | Y | rouleaux  | broad    | 0.379 (0.011) | N | N |               | this study  |
| Pachydrus princeps          | 3 | N |           | elongate | 1.803 (0.026) | Y | N |               | this study  |
| Pachydrus sp.               | 2 | Y | aggregate | elongate |               |   | N |               | this study  |
| Peschetius sp.              | 1 | Y | rouleaux  | broad    | 2.575*        | Y | N |               | this study  |
| Platambus semivittatus      | 5 | Y | aggregate | elongate | 0.405 (0.015) | N | Y | 0.228 (0.004) | this study  |
| Platynectes decempunctatus  | 2 | Y | aggregate | elongate | 2.088*        | Y | N |               | this study  |
| Platynectes laurianus       | 1 | ? |           | elongate | 1.626*        | Y | N |               | this study  |
| Porhydrus sp.               | 4 | N |           | broad    |               |   | N |               | this study  |
| Rhantaticus congestus       | 1 | Y | paired    | broad    | 0.314         | N | N |               | this study  |
| Rhantus atricolor           | 5 | Y | aggregate | broad    | 0.168 (0.002) | N | N |               | this study  |
| Rhantus binotatus           | 5 | Y | aggregate | broad    | 0.149 (0.002) | N | N |               | this study  |
| Rhantus calidus             | 1 | Y | aggregate | broad    | 0.317         | N | N |               | this study  |
| Rhantus consimilis          | 7 | Y | aggregate | broad    | 0.182 (0.003) | N | N |               | this study  |
| Rhantus guticollis          | 3 | Y | aggregate | broad    | 0.155 (0.004) | N | N |               | this study  |
| Rhantus sericans            | 2 | Y | aggregate | broad    | 0.227 (0.001) | N | N |               | Werner 1983 |
| Sternopriscus handsardii    | 1 | Y | rouleaux  | elongate | 0.642         | Y | N |               | this study  |
| Stictonectes sp.            | 1 | Y | rouleaux  | broad    |               |   | N |               | this study  |
| Stictotarsus aequinotialis  | 5 | Y | rouleaux  | broad    | 0.539*        | Y | N |               | this study  |
| Stictotarsus corpulentus    | 4 | Y | rouleaux  | broad    |               |   | N |               | this study  |
| Stictotarsus corvinus       | 2 | Y | rouleaux  | broad    | 0.521*        | N | N |               | this study  |
| Stictotarsus striatellus    | 1 | Y | rouleaux  | broad    | 0.472         | N | N |               | this study  |
| Thermonectus basilaris      | 5 | N |           | elongate | 0.202 (0.002) | N | N |               | this study  |
| Thermonectus marmoratus     | 4 | Y | paired    | broad    | 0.251 (0.001) | N | N |               | this study  |
| Thermonectus nigrofasciatus | 1 | Y | paired    | elongate | 0.288         | N | N |               | this study  |
| Uvarus lacustris            | 2 | Y | rouleaux  | elongate | 1.716         | Y | N |               | this study  |
| Yola sp.                    | 4 | Y | rouleaux  | broad    | 1.091*        | Y | N |               | this study  |
