# Supplementary material
Source: PubMed Central journal article supplement (PMC3775504)

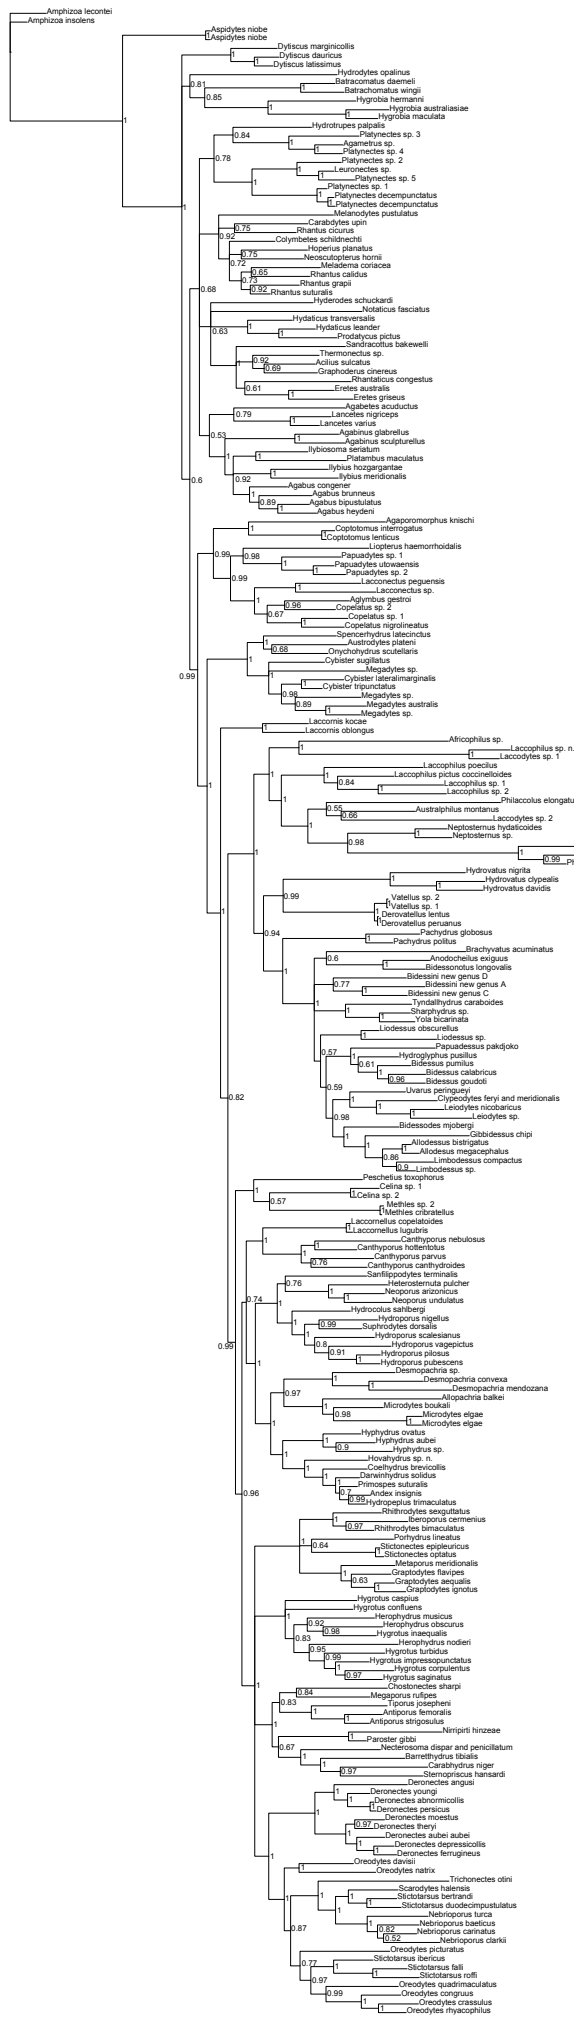

Supplement: NIHMS505035-supplement-Fig_S1.pdf [file NIHMS505035-supplement-Fig_S1.pdf]
